1 **Antagonistic role of the BTB-zinc finger transcription factors Chinmo and**  
2 **Broad-Complex in the juvenile/pupal transition and in growth control**

3 Sílvia Chafino<sup>1 2</sup>, Panagiotis Giannios<sup>1</sup>, Jordi Casanova<sup>1</sup>, David Martín<sup>2\*</sup> and Xavier  
4 Franch-Marro<sup>2\*</sup>

5

6

7 1-Institut de Biologia Molecular de Barcelona (CSIC), Barcelona, Catalonia, Spain,

8 Institut de Recerca Biomèdica de Barcelona, (IRB Barcelona), The Barcelona

9 Institute of Science and Technology (BIST), Barcelona, Catalonia, Spain

10 2 -Institute of Evolutionary Biology (IBE, CSIC-Universitat Pompeu Fabra), Passeig

11 de la Barceloneta 37, 08003 Barcelona, Catalonia, Spain.

12

13 \* Authors for correspondence: [xavier.franch@ibe.upf-csic.es](mailto:xavier.franch@ibe.upf-csic.es),

14 [david.martin@ibe.upf-csic.es](mailto:david.martin@ibe.upf-csic.es)

15

16 **Key words:** Chinmo, Br-C, E93, development, *Drosophila*, *Blattella*, wing disc,

17 salivary gland, evolution, metamorphosis

18 **Abstract**

19 **During development, the growing organism transits through a series of**  
20 **temporally regulated morphological stages to generate the adult form. In**  
21 **humans, for example, development progresses from childhood through to**  
22 **puberty and then to adulthood, when sexual maturity is attained. Similarly,**  
23 **in holometabolous insects, immature juveniles transit to the adult form**  
24 **through an intermediate pupal stage when larval tissues are eliminated and**  
25 **the imaginal progenitor cells form the adult structures. The identity of the**  
26 **larval, pupal and adult stages depends on the sequential expression of the**  
27 **transcription factors *chinmo*, *Br-C* and *E93*. However, how these**  
28 **transcription factors determine temporal identity in developing tissues is**  
29 **poorly understood. Here we report on the role of the larval specifier *chinmo***  
30 **in larval and adult progenitor cells during fly development. Interestingly,**  
31 ***chinmo* promotes growth in larval and imaginal tissues in a Br-C-**  
32 **independent and -dependent manner, respectively. In addition, we found**  
33 **that the absence of *chinmo* during metamorphosis is critical for proper adult**  
34 **differentiation. Importantly, we also provide evidence that, in contrast to the**  
35 **well-known role of *chinmo* as a pro-oncogene, Br-C and E93 act as tumour**  
36 **suppressors. Finally, we reveal that the function of *chinmo* as a juvenile**  
37 **specifier is conserved in hemimetabolous insects as its homolog has a similar**  
38 **role in *Blattella germanica*. Taken together, our results suggest that the**  
39 **sequential expression of the transcription factors Chinmo, Br-C and E93**  
40 **during larva, pupa an adult respectively, coordinate the formation of the**  
41 **different organs that constitute the adut organism.**

42

## 43 **Introduction**

44 Animal development passes through various stages characterised by distinct  
45 morphological and molecular changes. In humans, for instance, development  
46 continues from birth through to childhood and puberty to give rise to the adult  
47 form. As in many animals, in holometabolous insects such as *Drosophila*  
48 *melanogaster*, the developmental stages are sharply defined: embryogenesis gives  
49 rise to the larva, a juvenile stage, which, upon different rounds of growth and  
50 moulting, brings about a new stage structure, the pupa, when most of the larval  
51 cells die and the adult progenitor cells (imaginal cells) develop to generate the  
52 adult organism. The regulation of stage-specific differences is mediated by the  
53 action of two major developmental hormones, the steroid 20-hydroxyecdysone  
54 and the terpenoid juvenile hormone (Hiruma and Kaneko, 2013; Jindra et al., 2013;  
55 Truman, 2019; Truman and Riddiford, 2007, 2002; Yamanaka et al., 2013). Both  
56 hormones exert this precise developmental control by regulating the expression of  
57 three critical genes that encode for the stage-identity factors that compose the  
58 Metamorphic Gene Network (MGN): the C2H2 zinc finger type factor *Krüppel-*  
59 *homolog 1 (Kr-h1)*, the the helix turn–helix *Ecdysone inducible protein 93F (E93)*,  
60 and *Broad-complex (Br-C; also known as broad)*, a member of the bric-a-brac-  
61 tramtrack-broad family (Martín et al., 2021).

62

63 The deployment of the pupal-specific genetic program is controlled by the  
64 expression of *Br-C* at the larval–pupal transition (Truman, 2019; Zhou and  
65 Riddiford, 2002). Upon the formation of the pupa, hormone signalling triggers the  
66 expression of the helix-turn-helix factor *E93*, whose product represses *Br-C*  
67 expression and directs the formation of the final differentiated adult structures  
68 (Chafino et al., 2019; Martín et al., 2021; Ureña et al., 2014). While it is firmly  
69 established that *Br-C* and *E93* are the stage-specifying genes for the pupal and  
70 adult states, the nature of the larval specifying gene has been elusive. To date,  
71 larval identity has been attributed to *Kr-h1*, which is present during the larval  
72 period and represses *Br-C* and *E93* expression during this period (Huang et al.,  
73 2011; Ureña et al., 2016). However, although *Kr-h1* is undoubtedly critical for  
74 maintaining the larval state, evidence has shown that this factor cannot be  
75 considered the larval specifier *per se*. For example, depletion of *Kr-h1* in *Drosophila*

76 does not prevent normal larval development nor a timely transition to the pupa  
77 (Beck et al., 2004; Pecasse et al., 2000). In this regard, the product of  
78 *chronologically inappropriate morphogenesis (chinmo)* gene, another member of  
79 the BTB family of transcription factors, has been recently proposed to be  
80 responsible for larval identity in *Drosophila* (Truman and Riddiford, 2022).

81

82 First isolated based on its requirement for the temporal identity of mushroom  
83 body neurons (Zhu et al., 2006), the identification of Chinmo as a more general  
84 larval specifier has provided invaluable insights into the molecular mechanisms  
85 underlying the control of juvenile identity. Yet, little is known about how this  
86 factor exerts its function along with Br-C and E93. Moreover, given that  
87 holometabolous insects comprise both larval tissues and pools of adult progenitor  
88 cells, a central issue in the understanding of how larval identity is controlled is  
89 how larval and adult progenitor cells respond differentially to the same set of  
90 temporal transcription factors. Furthermore, in the sequential activation of  
91 *chinmo*, *Br-C* and *E93*, the extent of the activity directly attributable to each  
92 transcription factor or to their mutual repression is still unclear.

93

94 Here we confirm the role of *chinmo* as larval specifier in larval and adult  
95 progenitor cells and establish its regulatory interactions with the other temporal  
96 specifiers. We also examine how the temporal sequence of Chinmo and Br-C  
97 differently affects with the genetic program that establishes larval vs. imaginal  
98 identity. Thus, we found that Chinmo controls larval development of larval and  
99 imaginal tissues in a Br-C-independent and -dependent manner, respectively.  
100 According to these data, and in the context of the MGN, we also show that *chinmo*  
101 absence is critical for the transition from larva to pupa and then to adult, as it acts  
102 as a repressor of both *Br-C* and *E93*. In addition, we report that the *chinmo*  
103 homologue has a similar role in the cockroach *Blattella germanica*, thereby  
104 indicating that its function as a juvenile specifier precedes the  
105 hemimetabolous/holometabolous split. Finally, we show that in contrast to the  
106 well characterized role of *chinmo* as pro-oncogene, the *Br-C* pupal and E93 adult  
107 specifiers have those of tumour suppressor genes. These characteristics are

108 maintained besides insects and may account for the different role of some human  
109 BTB zinc-finger transcription factors in tumorigenesis.

110

## 111 **Results and Discussion**

### 112 ***chinmo* is expressed throughout larval stages and is required in larval and** 113 **imaginal tissues**

114 Examination of *chinmo* expression revealed that it is expressed during  
115 embryogenesis and early larval development and that it is strongly downregulated  
116 from L3 (**Figure 1A**). Immunostaining analysis in imaginal and larval tissues  
117 confirmed the presence of Chinmo in L1 and L2 stages and its disappearance in  
118 late L3 (**Figure 1B and C**), an expression profile that is in agreement with previous  
119 studies (Narbonne-Reveau and Maurange, 2019; Truman and Riddiford, 2022). We  
120 next addressed its functional requirement by knocking down this factor with an  
121 RNAi transgene controlled by the ubiquitous *ActGal4* driver. *chinmo*-depleted  
122 animals showed developmental arrest at the end of the first instar larval stage  
123 presenting a tanned cuticle clearly reminiscent to that of the pupa (**Figure 1D**).  
124 Consistent with the phenotype, we found that arrested *chinmo*-depleted larvae  
125 precociously expressed pupal cuticle genes while blocked larval specific genes  
126 activation (**Figure 1E**). These results confirm that *chinmo* is required for normal  
127 progression of the organism during the larval period, as proposed by Truman and  
128 Riddiford (Truman and Riddiford, 2022).

129

130 Since *Drosophila* larva consists of a combination of larval and imaginal tissues, we  
131 then analysed the contribution of *chinmo* to the development of these two types of  
132 tissues. Regarding the former, *chinmo* was selectively depleted in the salivary  
133 glands (SGs) using the *forkhead* (*fkh*) driver (*fkhGal4*), which is active in this tissue  
134 from embryogenesis onwards. The SG is a secretory organ that develops from  
135 embryonic epithelial placodes (Abrams et al., 2003; Bradley et al., 2001; Camelo  
136 and Luschnig, 2021) and increases dramatically in size by cell endoreplication  
137 during the larval period (Edgar et al., 2014; Zielke et al., 2013). This tissue is  
138 responsible for producing glycosylated mucin for the lubrication of food during the  
139 larval period (Costantino et al., 2008; Farkaš et al., 2014; Riddiford, 1993; Syed et  
140 al., 2008) and for synthesising glue proteins for the attachment of the pupa to a

141 solid surface at the onset of metamorphosis (Andres et al., 1993; Costantino et al.,  
142 2008; Kaieda et al., 2017). As it is shown in **Figure 2A**, although depletion of  
143 *chinmo* in the SG did not affect the formation of this organ, it caused a dramatic  
144 decrease in normal larval development, as revealed by the strong reduction in size  
145 and DNA content of the gland cells (**Figure 2B-D**). Consistently, the expression  
146 levels of *salivary gland secretion (sgs)* genes, which encode for several components  
147 of the glue, were markedly repressed in *chinmo* depleted SG compared to control  
148 (**Figure 2E**).

149

150 Regarding the role of *chinmo* in imaginal tissues, we knocked down this factor in  
151 wing imaginal discs from the embryonic period onwards using the *escargot (esg)*  
152 driver (*esgGal4*). As before, depletion of *chinmo* in the *esg* domain did not alter the  
153 specification of the disc, but strongly impeded its larval development. Thus, in late  
154 L3 wing discs only the notum, which does not express the *esgGal4* driver, was  
155 observed while the wing pouch, revealed by positive GFP signal, was strongly  
156 reduced and did not show the expression of patterning genes such as *wingless (wg)*  
157 and *cut (ct)* (**Figure 3A**). In line with these results, although most of the *chinmo*  
158 depleted animals arrested development as pharate adults, escapers that were able  
159 to eclose (15%) had no wings (**SFigure 1**). Taken together, these data show that  
160 Chinmo is required during the larval period to control the development and  
161 function of larval and imaginal tissues.

162

### 163 **Distinct roles of Chinmo in larval and progenitor cells**

164 A critical feature of the MGN factors is that their sequential expression is achieved  
165 through a series of regulatory interactions between them. Therefore, we next  
166 sought to characterise the regulatory interactions of Chinmo with the pupal  
167 specifier Br-C and the adult specifier E93. To this end, we measured the expression  
168 of *Br-C* and *E93* in *chinmo*-depleted SGs and wing discs. Contrary to recently  
169 published data (Truman and Riddiford, 2022), both tissues showed a significant  
170 and premature increase of Br-C protein levels as early as in L1 larvae, while no  
171 increase in E93 protein levels was detected in any tissue (**Figure 4**).

172

173 In view of these results, we speculated whether the impairment of larval  
174 development observed in *chinmo*-depleted animals could be the result of  
175 precocious presence of the wrong stage-identity factor, in this case, Br-C. To  
176 address this notion, we precociously expressed Br-CZ1, the main Br-C isoform  
177 expressed during imaginal larval development (Narbonne-Reveau and Maurange,  
178 2019), in SGs and wing discs. Interestingly, as previously described ectopic  
179 expression of Br-CZ1 blocked Chinmo activation (Narbonne-Reveau and Maurange,  
180 2019 and data not shown). As a consequence precocious upregulation of Br-C  
181 phenocopied the loss of function of *chinmo* as blocks development in both tissues  
182 (SFigure 2). This result suggests that the main function of Chinmo is to avoid the  
183 expression of the pupal specifier Br-C during the juvenile stages. To confirm this  
184 hypothesis we simultaneously depleted *chinmo* and *Br-C* in SGs and wing discs.  
185 Remarkably, whereas SGs showed the same growth impairment as that observed  
186 upon *chinmo* depletion (Figure 5A-E), the absence of *Br-C* and *chinmo* largely  
187 rescued the abnormalities of the wing discs seen upon depletion of this  
188 transcription factor. The double knock-out wing discs developed in a regular  
189 manner to reach normal size by the end of L3 and showed proper expression of  
190 patterning genes such as *wg* (Figure 5F). Taken together, our results suggest that a  
191 major regulatory function of *chinmo* during early larval development in adult  
192 progenitor cells is channelled through the repression of *Br-C*, while in larval tissues  
193 it appears to exert specific growth-related functions that are independent to *Br-C*  
194 repression. Thus, Chinmo ensures the expression of juvenile genes by repressing  
195 Br-C, a well known inhibitor of larval gene expression (Zhou and Riddiford, 2002).  
196 In this regard, it is tempting to speculate that Br-C might repress the early  
197 expression of critical components of signaling pathways such as wingless and  
198 EGFR, involved in wing fate specification in early larval development (Ng et al.,  
199 1996; Wang et al., 2000; Zecca and Struhl, 2002). In contrast, Chinmo seems to  
200 exert an active role promoting growth in larval tissues. This different response  
201 could be explained by the nature of the two types of tissues. While larval tissues  
202 are mainly devoted to growth during the larval period and then fated to die during  
203 the metamorphic transition, the developmental identity of the imaginal cells is  
204 modified along the larva-pupa-adult temporal axis to give rise to the adult  
205 structures. In fact, it has already been shown that the other members of the MGN

206 exert different functions depending on the type of tissue. For example, while *Br-C*  
207 is necessary for the degeneration of the SG during the onset of the pupal period  
208 (Jiang et al., 2000), it is critical for the correct eversion of the wing disc and for the  
209 temporary G2 arrest that synchronizes the cell cycle in the wing epithelium during  
210 early pupa wing elongation (Guo et al., 2016). Likewise, *E93* is necessary to  
211 activate autophagy for elimination of mushroom body neuroblasts in late pupae  
212 (Pahl et al., 2019), whereas it controls the terminal adult differentiation of the  
213 wing during the same period (Ureña et al., 2016; Uyehara et al., 2017).

214

### 215 **Down-regulation of *chinmo* is required during metamorphosis**

216 The functional and expression data reported above show that *Chinmo* acts as a  
217 larval specifier in *Drosophila*. From this, we could infer that its absence by the end  
218 of larval development is required first for the transition to the prepupa, and then  
219 to allow terminal adult differentiation during the pupal period. If this were the  
220 case, then, the maintenance of high levels of *chinmo* during late L3 would interfere  
221 with the larva-pupal transition. To test this possibility, we maintained high levels  
222 of *chinmo* in late L3 wing discs using the *Gal4/Gal80<sup>ts</sup>* system. Consistent with our  
223 hypothesis, overexpressing *chinmo* from early L3 in the anterior compartment of  
224 the disc using the *cubitus interruptus ciGal4* driver abolished *Br-C* expression and  
225 induced apoptosis in this compartment at late L3 as revealed by the high  
226 expression of the effector caspase *Dcp-1* (Figure 6A). As a result, the size of the  
227 anterior compartment was dramatically reduced, and the expression of patterning  
228 genes such as *ct* was halted (Figure 6B). The impairment of *ct* expression was not  
229 due to the death of the tissue, but to a specific response to the sustained  
230 expression of *chinmo* or to depletion of *Br-C*, as its expression was still not  
231 detected in wing discs overexpressing both *chinmo* and the p35 inhibitor of  
232 effector caspases (Hay et al., 1994) (Figure 6C and D).

233

234 An alternative way to maintain high levels of *chinmo* in late L3 is by depleting *Br-C*,  
235 a well-known repressor of *chinmo* from mid-L3 (Narbonne-Reveau and Maurange,  
236 2019). Therefore, we knocked down *Br-C* in the anterior compartment of the wing  
237 disc. As expected, *Chinmo* levels remained high in this compartment of late L3  
238 wing disc, with a concomitant strong *Dcp-1* staining and impairment of *ct*



239 expression (Figure 6E and F). Importantly, simultaneous depletion of *chinmo* and  
240 *Br-C* from early L3 did not lead to an increase in apoptosis (Figure 6G) nor alter the  
241 expression of patterning genes (Figure 5F), which indicates that tissue death at the  
242 end of the larval period is due to sustained expression of *Chinmo* rather than the  
243 absence of *Br-C*. Altogether, these results confirm that the transition from larva to  
244 pupa must take place in the absence of the larval specifier *Chinmo*.

245

246 Next, we analyzed whether lack of *chinmo* is also important during the pupal  
247 period for the *E93*-dependent development of the adult. To this end, we used the  
248 thermo-sensitive system to overexpress *chinmo* in the anterior part of the wing  
249 specifically during the pupal stage. This ectopic expression of *chinmo* led to a  
250 marked decrease in *E93* protein levels (Figure 7A). As a result, the anterior  
251 compartment of the wing was strongly undifferentiated, a phenotype reminiscent  
252 of that observed in *E93*-depleted wings (Ureña et al., 2014, 2016) (Figure 7B).  
253 Taken together, our results show that *chinmo* must be downregulated during the  
254 initiation and throughout the metamorphic transition to allow the sequential  
255 expression of the pupal specifier *Br-C* and the adult specifier *E93*.

256

### 257 **Antagonistic effects of *chinmo*, and *Br-C/E93* in tumour growth**

258 *Chinmo* and *Br-C* belong to the extended family of BTB-ZF transcription factors,  
259 which are not restricted to insects. In humans, many such factors have been  
260 implicated in cancer, where they have opposing effects, from oncogenic to tumour  
261 suppressor functions (Siggs and Beutler, 2012). However, while overexpression of  
262 *Drosophila chinmo* has been found to cooperate with *Ras* or *Notch* to trigger  
263 massive tumour overgrowth (Doggett et al., 2015), changes in *Drosophila Br-C*  
264 expression have not been associated with any effect on tumorigenesis. Since our  
265 results described in here, and those from other labs (Narbonne-Reveau and  
266 Maurange, 2019) indicate that *chinmo* and *Br-C* have antagonistic effects in terms  
267 of proliferation vs. differentiation, we addressed whether these opposite features  
268 might also be associated with pro-oncogenic or tumour suppressor properties,  
269 respectively. To test this notion, we resorted to the well-defined tumorigenesis  
270 model in *Drosophila* generated by the depletion of cell polarity genes such as *lgl*  
271 (Froldi et al., 2008; Gong et al., 2021). To suppress *lgl* and create an oncogenic

272 sensitised background (Figure 8A, B and G), we used two *UASlgl<sup>RNAi</sup>* constructs  
273 recombined on the third chromosome to drive their expression by *nubbinGal4*  
274 (*nubGal4*) in the imaginal wing disc pouch.

275

276 Interestingly, RNAi-mediated depletion of *Br-C* in the wing discs in the  
277 downregulated *lgl* background resulted in an increase in the mean wing pouch  
278 volume compared to the downregulation of *lgl* alone (Figure 8B, C and G).  
279 Consistently, overexpression of *Br-C* in the same *lgl* background had the opposite  
280 effect, reducing the size of the *lgl*-induced overgrowth, thereby confirming that *Br-*  
281 *C* expression elicits tumour suppressor activity (Figure 8D and G). Given that *E93*  
282 has a similar pro-differentiation role to that of *Br-C*, we also examined whether *E93*  
283 also exerts tumour suppressor activity. We found that overexpression of *E93* also  
284 reduced the size of *lgl* overgrowth (Figure 8E, G). However, as *E93* overexpression  
285 triggers cell death in some tissues (Pahl et al., 2019), we wanted to assess whether  
286 the reduction of the pouch region in this case was caused by apoptosis induction.  
287 When *E93* overexpression was combined with the p35 inhibitor of apoptosis, we  
288 still observed a reduction in the size of the wing pouch in the *lgl*-sensitised  
289 background (Figure 8F, G). Thus, even in this regard, *chinmo* plays an opposite  
290 function than *Br-C* and *E93*; while *chinmo* has pro-oncogenic features, *Br-C* and  
291 *E93* act as tumour suppressors.

292

### 293 **Role of *chinmo* in hemimetabolous development**

294 As full metamorphosis is an evolutionary acquisition of holometabolous insects  
295 from hemimetabolous ancestors with no pupal stage (Truman, 2019), we sought to  
296 determine whether the role of *chinmo* as a larval specifier was also present in  
297 hemimetabolous insects. To this end, we used the German cockroach *Blattella*  
298 *germanica* as a model for hemimetabolous development. *Blattella* goes through six  
299 juvenile nymphal instars (N1-N6) before developing into an adult. Metamorphosis  
300 takes place during N6 and is restricted to the transformation of the wing primordia  
301 into functional wings, the attainment of functional genitalia, and changes in cuticle  
302 pigmentation (Ureña et al., 2014). A detailed Tblastn search in the *Blattella* genome  
303 database revealed the presence of a *chinmo* orthologue (*Bg-chinmo*).

304

305 To study *Bg-chinmo*, we first examined its expression during the life cycle of  
306 *Blattella*. We found that it is highly expressed in embryos and decreases  
307 dramatically thereafter during nymphal development (Figure 9A). In order to  
308 analyze the function of the relative low levels of *Bg-chinmo* during postembryonic  
309 stages, we analysed the function of *Bg-Chinmo* by systemic injection of dsRNAs into  
310 newly emerged N4 instar. Specimens injected with dsMock were used as negative  
311 controls (Control animals). Importantly, whereas Control larvae underwent two  
312 larval molts before initiating metamorphosis at the end of the N6 stage, 43% of *Bg-*  
313 *chinmo*<sup>RNAi</sup> animals underwent only one nymphal molt before molting to an early  
314 adult after the N5 stage (Figure 9B-E). Precocious *chinmo*-depleted adults were  
315 smaller than control counterparts as they skipped a nymphal stage. However, they  
316 presented all the external characteristics of an adult, namely functional hind- and  
317 fore-wings, adult cerci, and adult-specific cuticle pigmentation. Altogether, these  
318 results suggest that the role of Chinmo as juvenile specifier seems to be conserved  
319 in hemimetabolous insects, thereby indicating that its developmental function  
320 precedes the hemimetabolous-holometabolous split.

321

322 In summary, we identified Chinmo as a new member of the MGN acting as a  
323 general larval specifier, as recently proposed by Truman and Riddiford (Truman  
324 and Riddiford, 2022). Together with a number of previous reports (reviewed in  
325 (Martín et al., 2021)), our results show that the temporal expression of Chinmo, Br-  
326 C and E93 determine the tissue acquisition of gradual differentiation features from  
327 the juvenile to the adult to generate the distinct organs. Whereas Chinmo  
328 maintains cells in an undifferentiated state, Br-C and E93 induce progressively the  
329 differentiation program. This effect has already been shown in the central nervous  
330 system where early-born neurons are characterized by the expression of Chinmo,  
331 whereas smaller late-born neurons are marked by expression of Br-C (Maurange et  
332 al., 2008). Similarly, the *chinmo*-to-*Br-C* transition in *Drosophila* has been  
333 associated with the loss of the regenerative potential of imaginal cells (Narbonne-  
334 Reveau and Maurange, 2019). The fact that Br-C and E93 acts a tumor suppressor in  
335 a overproliferative background supports this idea.

336

337 Finally we found that the role of chinmo as larval specifier is conserved in  
338 hemimetabolous insects. Since hemimetabolous insects do not undergo the  
339 intermediate pupal stage, the transition from juvenile to adult, therefore, relies  
340 exclusively on the shift from Chinmo to E93 during the last nymphal stage, with Kr-  
341 h1 also involved in preventing metamorphosis through the repression of *E93*  
342 (Ureña et al., 2016). Interestingly, Br-C in most hemimetabolans has been shown to  
343 exert no role during development (Erezyilmaz et al., 2006; Konopova et al., 2011),  
344 suggesting that this factor has been co-opted as a pupal specifier during the arise  
345 of holometabolous insects.

346

## 347 **Materials and Methods**

### 348 **Fly strains**

349 All fly stocks were reared at 25°C on standard flour/agar *Drosophila* media. The  
350 Gal4/UAS system was used to drive the expression of transgenes at 29°C.  
351 Gal4/Gal80ts system was used for conditional activation. In these experiments,  
352 crosses were kept at 18 until L2 or L3-late molt and then shifted to 29°C for  
353 conditional induction. The following strains used in this study were provided by  
354 the Bloomington *Drosophila* Stock Center (BDSC): *fkhGal4* (#78060); *ActGal4*  
355 (#3954); *TubGal80ts* (#7016), *UASchinmo<sup>RNAi</sup>* (#26777); *UASchinmo* (#50740);  
356 *UASBr-C<sup>RNAi</sup>* (#51378); *UASP35* (#5072); *UAS-myr-mRFP* (#7118) and *UAS-*  
357 *mCD8::GFP* (#32186) were used to follow the GAL4 driver activity. Two lines of  
358 *UASlg<sup>RNAi</sup>* (#51247 and #51249) were obtained from Vienna *Drosophila* RNAi  
359 Center (VDRC). *nubGal4* (Calleja et al., 1996), *esgGal4UASGFP* (Jiang et al., 2009)  
360 and *ciGal4* (Crocker et al., 2006) were used to drive the expression of different  
361 constructs in the wing disc. Crosses to *CantonS* line were used as control.

362

### 363 ***Blattella germanica***

364 Specimens of *B. germanica* were obtained from a colony reared in the dark at 30 ±  
365 1 °C and 60–70% relative humidity. Cockroaches undergo hemimetabolous  
366 development, where growth and maturation take place gradually and  
367 simultaneously during a series of nymphal instars. In our rearing conditions, *B.*  
368 *germanica* undergoes six nymphal instars (N1–N6) before molting into the adult.

369 All dissections and tissue sampling were carried out on carbon dioxide  
370 anesthetized specimens.

371

### 372 **Immunohistochemistry**

373 For fluorescent imaging, SGs, wing discs from different juvenile stages and pupal  
374 wings were dissected in 1XPhosphate-Buffered Saline (PBS) and fixed in 4%  
375 formaldehyde for 20 min at RT. The tissues were rinsed in 0.1% Triton X-100  
376 (PBST) or 0.3% PBST in pupal wings for 1h and incubated at 4°C with primary  
377 antibodies diluted in PBST overnight. After incubation with primary antibodies,  
378 the tissues were washed with PBST (3 x 10min washes) and incubated with  
379 adequate combinations of secondary antibodies (Alexa Conjugated dyes 488, 555,  
380 647, Life Technologies, 1:500) for 2h at RT, followed by 3 x 10min washes with  
381 PBST, and then rinsed with PBS before mounting in Vectashield with DAPI (Vector  
382 Laboratories, H1200) for image acquisition. The following primary antibodies  
383 were used at indicated dilution: rat anti-Chinmo (1:500, N, Sokol), mouse anti-Cut  
384 (1:200, Developmental Studies Hybridoma Bank (DSHB) #2B10), mouse anti-Wg  
385 (1:200, DSHB #4D4), mouse anti Br-C core (1:250 DSHB #25E9.D7), rabbit anti-  
386 cleaved Dcp-1 (1:100, Cell Signaling #9578) and rabbit anti-E93 (1:50, this work).

387

### 388 **Antibody generation**

389 A peptide corresponding to the 23 residues (GRRAYSEEDLSRALQDVVANKL) of  
390 E93 was coupled to KLH and was injected into rabbits. Polyclonal antisera were  
391 affinity-purified and were found to be specific for E93, by Western blotting and by  
392 immuno-fluorescence.

393

### 394 **RNA extraction and quantitative real-time reverse transcriptase polymerase 395 chain reaction (qRT-PCR)**

396 Total RNA was isolated with the GenElute Mammalian Total RNA kit (Sigma),  
397 DNase treated (Promega) and reverse transcribed with Superscript II reverse  
398 transcriptase (Invitrogen) and random hexamers (Promega). In the case of  
399 *Drosophila*, cDNA was obtained from whole larvae (CantonS) or L3 wandering SGs.  
400 *Blattella germanica* cDNAs were obtained from whole nymphs or wings and PG of  
401 different juvenile instars. Relative transcripts levels were determined by real-time

402 PCR (qPCR), using iTaq Universal SYBR Green Supermix (Bio-Rad). To standardize  
403 the qPCR inputs, a master mix that contained iTaq Universal SYBR Green PCR  
404 Supermix and forward and reverse primers was prepared (final concentration:  
405 100nM/qPCR). The qPCR experiments were conducted with the same quantity of  
406 tissue equivalent input for all treatments and each sample was run in duplicate  
407 using 2µl of cDNA per reaction. All the samples were analyzed on the iCycler iQ  
408 Real Time PCR Detection System (Bio-Rad). RNA expression was calculated in  
409 relation to the expression of *DmRpl32* or *BgActin5C*. Primers sequences for qPCR  
410 analyses were (Duan et al., 2020):

411 *DmChinmo*-F: 5' AGTTCTGCCTCAAATGGAACAG '3

412 *DmChinmo*-R: 5' CGCAGGATAATATGACATCGGC '3

413 *DmSgs1*- F : 5'CCCAATCCCGTGTGGCCCTG '3

414 *DmSgs1*- R : 5' GTGATGGCAACGGCGGTGGT '3

415 *DmSgs3*- F: 5' TGCTACCGCCCTAGCGAGCA '3

416 *DmSgs3*- R: 5' GTGCACGGAGGTTGCGTGGT '3

417 *DmSgs4*- F: 5' ACGCATCAAGCGACACCGCA '3

418 *DmSgs4*- R: 5'TCCTCCACCGCCGATTCGT '3

419 *DmSgs7*- F: 5' CGCAGTCACCATCATCGCTTGC '3

420 *DmSgs7*- R : 5'ACAGCCCGTGCAGGCCTTTC '3

421 *DmSgs8*-F: 5' AGCTGCTCGTTGTGCGCGTC '3

422 *DmSgs8*- R: 5' GCGGAACACCCAGGACACGG '3

423 *DmRpl32*-F: 5'CAAGAAGTTCCTGGTGCACAA'3

424 *DmRpl32*-R: 5'AAACGCGGTTCTGCATGAG'3

425 *BgChinmo*-F: 5' CAGCACCCTATGTCCAAGTG '3

426 *BgChinmo*-R: 5' CAGGAACTGGAGAGGCTTTC '3

427 *BgActin5C*-F: 5'-AGCTTCCTGATGGTCAGGTGA-3'

428 *BgActin5C*-R: 5'-TGTCGGCAATTCCAGGGTACATGGT-3'

429

#### 430 **RNA interference (RNAi)**

431 RNAi in vivo in nymphs was performed as previously described (Cruz et al., 2007;  
432 Martín et al., 2006). A dose of 1 µl (4–8 µg/µl) of the dsRNA solution was injected  
433 into the abdomen of newly antepenultimate (N4d0) instar nymphs, and left until  
434 analysed. To promote the RNAi effect, the same dose of dsRNAs was reapplied to

435 all treated animals after three days (N4d3) from the first injection. Control dsRNA  
436 consisted of a non-coding sequence from the pSTBlue-1 vector (dsControl). The  
437 primers used to generate templates via PCR for transcription of the dsRNA were:

438 *BgChinmo-F*: 5'CAGCACCACTATGTCCAAGTG'3

439 *BgChinmo-R*: 5'GAGTCCTGCATGGCTTCGGA'3

440

#### 441 **Imaging acquisition and analysis**

442 Images were obtained with the Leica TCS SP5 and the Zeiss LSM880 confocal  
443 microscopes. The same imaging acquisition parameters were used for all the  
444 comparative analyses. Images were processed with the Imaris Software (Oxford  
445 Instruments), Fiji or Photoshop CS4 (Adobe). For DNA quantification and nuclear  
446 size of SGs, DNA staining intensity in the SG cells was obtained from z stacked  
447 images every 0.25  $\mu\text{m}$  of DAPI stained L3 larvae. Image analysis was performed  
448 using Fiji. The volume of the wing pouch region was measured in Imaris software  
449 (Oxford Instruments). Adult flies, nymphal parts and adult cockroach images were  
450 acquired using AxioImager.Z1 (ApoTome 213 System, Zeiss) microscope, and  
451 images were subsequently processed using Photoshop CS4 (Adobe).

452

#### 453 **Statistical analysis**

454 Statistical analysis and graphical representations were performed in GraphPad  
455 Prism 9 software. All experiments were performed with at least three biological  
456 replicates. Two-tailed Student's test and Welch's ANOVA followed by Dunnett's T3  
457 post hoc tests were used to determine significant differences.

458

#### 459 **Acknowledgements**

460 The ICTS "NANOBIOSIS", and particularly the Custom Antibody Service (CABS,  
461 IQAC-CSIC, CIBER-BBN), is acknowledged for the assistance and support related to  
462 the E93 antibody used in this work. This project is supported by the Spanish  
463 MINECO (grant PGC2018-098427-B-I00 and PID2021-125661NB-100 to D.M., and  
464 X.F-M. and grant PGC2018-094254-B-100 to J.C) and by the Catalan Government  
465 (2017-SGR 1030 to D.M. and X.F-M and trthought BIST to J.C.). The research has

466 also benefited from FEDER funds. S.C. is a recipient of a Juan de la Cierva contract  
467 from the MINECO.

468

## 469 **References**

- 470 Abrams EW, Vining MS, Andrew DJ. 2003. Constructing an organ: The *Drosophila*  
471 salivary gland as a model for tube formation. *Trends Cell Biol.*  
472 doi:10.1016/S0962-8924(03)00055-2
- 473 Andres AJ, Fletcher JC, Karim FD, Thummel CS. 1993. Molecular analysis of the  
474 initiation of insect metamorphosis: A comparative study of *Drosophila*  
475 ecdysteroid-regulated transcription. *Dev Biol* **160**:388–404.  
476 doi:10.1006/dbio.1993.1315
- 477 Beck Y, Pecasse F, Richards G. 2004. Krüppel-homolog is essential for the  
478 coordination of regulatory gene hierarchies in early *Drosophila* development.  
479 *Dev Biol* **268**:64–75. doi:10.1016/j.ydbio.2003.12.017
- 480 Bradley PL, Haberman AS, Andrew DJ. 2001. Organ formation in *Drosophila*:  
481 Specification and morphogenesis of the salivary gland. *BioEssays.*  
482 doi:10.1002/bies.1131
- 483 Calleja M, Moreno E, Pelaz S, Morata G. 1996. Visualization of gene expression in  
484 living adult *Drosophila*. *Science (80- )* **274**:252–255.  
485 doi:10.1126/science.274.5285.252
- 486 Camelo C, Luschnig S. 2021. Cells into tubes: Molecular and physical principles  
487 underlying lumen formation in tubular organs *Current Topics in*  
488 *Developmental Biology.* Academic Press Inc. pp. 37–74.  
489 doi:10.1016/bs.ctdb.2020.09.002
- 490 Chafino S, Ureña E, Casanova J, Casacuberta E, Franch-Marro X, Martín D. 2019.  
491 Upregulation of E93 Gene Expression Acts as the Trigger for Metamorphosis  
492 Independently of the Threshold Size in the Beetle *Tribolium castaneum*. *Cell*  
493 *Rep* **27**:1039-1049.e2. doi:10.1016/j.celrep.2019.03.094
- 494 Costantino BFB, Bricker DK, Alexandre K, Shen K, Merriam JR, Antoniewski C,  
495 Callender JL, Henrich VC, Presente A, Andres AJ. 2008. A Novel Ecdysone  
496 Receptor Mediates Steroid-Regulated Developmental Events during the Mid-  
497 Third Instar of *Drosophila*. *PLoS Genet* **4**:e1000102.



- 498 doi:10.1371/journal.pgen.1000102
- 499 Croker JA, Ziegenhorn SL, Holmgren RA. 2006. Regulation of the *Drosophila*
- 500 transcription factor, *Cubitus interruptus*, by two conserved domains. *Dev Biol*
- 501 **291**:368–381. doi:10.1016/j.ydbio.2005.12.020
- 502 Cruz J, Martín D, Bellés X. 2007. Redundant ecdysis regulatory functions of three
- 503 nuclear receptor HR3 isoforms in the direct-developing insect *Blattella*
- 504 *germanica*. *Mech Dev* **124**:180–189. doi:10.1016/j.mod.2006.12.003
- 505 Doggett K, Turkel N, Willoughby LF, Ellul J, Murray MJ, Richardson HE, Brumby AM.
- 506 2015. BTB-Zinc Finger Oncogenes Are Required for Ras and Notch-Driven
- 507 Tumorigenesis in *Drosophila*. *PLoS One* **10**:e0132987.
- 508 doi:10.1371/journal.pone.0132987
- 509 Duan J, Zhao Y, Li H, Habernig L, Gordon MD, Miao X, Engström Y, Büttner S. 2020.
- 510 Bab2 Functions as an Ecdysone-Responsive Transcriptional Repressor during
- 511 *Drosophila* Development. *Cell Rep* **32**. doi:10.1016/j.celrep.2020.107972
- 512 Edgar BA, Zielke N, Gutierrez C. 2014. Endocycles: A recurrent evolutionary
- 513 innovation for post-mitotic cell growth. *Nat Rev Mol Cell Biol*.
- 514 doi:10.1038/nrm3756
- 515 Erezylmaz DF, Riddiford LM, Truman JW. 2006. The pupal specifier broad directs
- 516 progressive morphogenesis in a direct-developing insect. *Proc Natl Acad Sci U*
- 517 *S A* **103**:6925–6930. doi:10.1073/pnas.0509983103
- 518 Farkaš R, Ďatková Z, Mentelová L, Löw P, Beňová-Liszeková D, Beňo M, Sass M,
- 519 Řehulka P, Řehulková H, Raška O, Kováčik L, Šmigová J, Raška I, Mechler BM.
- 520 2014. Apocrine Secretion in *Drosophila* Salivary Glands: Subcellular Origin,
- 521 Dynamics, and Identification of Secretory Proteins. *PLoS One* **9**:e94383.
- 522 doi:10.1371/journal.pone.0094383
- 523 Froidi F, Ziosi M, Tomba G, Parisi F, Garoia F, Pession A, Grifoni D. 2008. *Drosophila*
- 524 Lethal Giant Larvae Neoplastic Mutant as a Genetic Tool for Cancer Modeling.
- 525 *Curr Genomics* **9**:147–154. doi:10.2174/138920208784340786
- 526 Gong S, Zhang Y, Tian A, Deng W. 2021. Tumor models in various *Drosophila*
- 527 tissues. *WIREs Mech Dis* **13**:e1525. doi:10.1002/wsbm.1525
- 528 Guo Y, Flegel K, Kumar J, McKay DJ, Buttitta LA. 2016. Ecdysone signaling induces
- 529 two phases of cell cycle exit in *Drosophila* cells. *Biol Open* **5**:1648–1661.
- 530 doi:10.1242/bio.017525

- 531 Hiruma K, Kaneko Y. 2013. Hormonal regulation of insect metamorphosis with  
532 special reference to juvenile hormone biosynthesis. *Curr Top Dev Biol* **103**:73–  
533 100. doi:10.1016/B978-0-12-385979-2.00003-4
- 534 Huang J, Tian L, Peng C, Abdou M, Wen D, Wang Y, Li S, Wang J. 2011. DPP-  
535 mediated TGF $\beta$  signaling regulates juvenile hormone biosynthesis by  
536 activating the expression of juvenile hormone acid methyltransferase.  
537 *Development* **138**:2283–2291. doi:10.1242/dev.057687
- 538 Jiang C, Lamblin AFJ, Steller H, Thummel CS. 2000. A steroid-triggered  
539 transcriptional hierarchy controls salivary gland cell death during *Drosophila*  
540 metamorphosis. *Mol Cell* **5**:445–455. doi:10.1016/S1097-2765(00)80439-6
- 541 Jiang H, Patel PH, Kohlmaier A, Grenley MO, McEwen DG, Edgar BA. 2009.  
542 Cytokine/Jak/Stat Signaling Mediates Regeneration and Homeostasis in the  
543 *Drosophila* Midgut. *Cell* **137**:1343–1355. doi:10.1016/j.cell.2009.05.014
- 544 Jindra M, Palli SR, Riddiford LM. 2013. The juvenile hormone signaling pathway in  
545 insect development. *Annu Rev Entomol* **58**:181–204. doi:10.1146/annurev-  
546 ento-120811-153700
- 547 Kaieda Y, Masuda R, Nishida R, Shimell MJ, O'Connor MB, Ono H. 2017. Glue protein  
548 production can be triggered by steroid hormone signaling independent of the  
549 developmental program in *Drosophila melanogaster*. *Dev Biol* **430**:166–176.  
550 doi:10.1016/j.ydbio.2017.08.002
- 551 Konopova B, Smykal V, Jindra M. 2011. Common and distinct roles of juvenile  
552 hormone signaling genes in metamorphosis of holometabolous and  
553 hemimetabolous insects. *PLoS One* **6**:e28728.  
554 doi:10.1371/journal.pone.0028728
- 555 Martín D, Chafino S, Franch-Marro X. 2021. How stage identity is established in  
556 insects: the role of the Metamorphic Gene Network. *Curr Opin Insect Sci*.  
557 doi:10.1016/j.cois.2020.10.002
- 558 Martín D, Maestro O, Cruz J, Mané-Adrós D, Bellés X. 2006. RNAi studies reveal a  
559 conserved role for RXR in molting in the cockroach *Blattella germanica*. *J*  
560 *Insect Physiol* **52**:410–416. doi:10.1016/j.jinsphys.2005.12.002
- 561 Maurange C, Cheng L, Gould AP. 2008. Temporal transcription factors and their  
562 targets schedule the end of neural proliferation in *Drosophila*. *Cell* **133**:891–  
563 902. doi:10.1016/j.cell.2008.03.034

- 564 Narbonne-Reveau K, Maurange C. 2019. Developmental regulation of regenerative  
565 potential in *Drosophila* by ecdysone through a bistable loop of ZBTB  
566 transcription factors. *PLoS Biol* **17**:e3000149-26.  
567 doi:10.1371/journal.pbio.3000149
- 568 Ng M, Diaz-benjumea FJ, Vincent J, Wut J, Cohen SM. 1996. Wingless Protein  
569 **381**:316–318.
- 570 Pahl MC, Doyle SE, Siegrist SE. 2019. E93 Integrates Neuroblast Intrinsic State with  
571 Developmental Time to Terminate MB Neurogenesis via Autophagy. *Curr Biol*  
572 **29**:750-762.e3. doi:10.1016/j.cub.2019.01.039
- 573 Pecasse F, Beck Y, Ruiz C, Richards G. 2000. Kruppel-homolog, a stage-specific  
574 modulator of the prepupal ecdysone response, is essential for *drosophila*  
575 metamorphosis. *Dev Biol* **221**:53–67. doi:10.1006/dbio.2000.9687
- 576 Riddiford LM. 1993. The development of *Drosophila melanogaster*, Cold Spring  
577 Harbor Laboratory Press.
- 578 Siggs OM, Beutler B. 2012. The BTB-ZF transcription factors. *Cell Cycle*.  
579 doi:10.4161/cc.21277
- 580 Syed ZA, Härd T, Uv A, van Dijk-Härd IF. 2008. A Potential Role for *Drosophila*  
581 Mucins in Development and Physiology. *PLoS One* **3**:e3041.  
582 doi:10.1371/journal.pone.0003041
- 583 Truman JW. 2019. The Evolution of Insect Metamorphosis. *Curr Biol*.  
584 doi:10.1016/j.cub.2019.10.009
- 585 Truman JW, Riddiford LM. 2022. Chinmo is the larval member of the molecular  
586 trinity that directs *Drosophila* metamorphosis. *Proc Natl Acad Sci U S A* **119**.  
587 doi:10.1073/pnas.2201071119
- 588 Truman JW, Riddiford LM. 2007. The morphostatic actions of juvenile hormone.  
589 *Insect Biochem Mol Biol* **37**:761–770. doi:10.1016/j.ibmb.2007.05.011
- 590 Truman JW, Riddiford LM. 2002. Endocrine insights into the evolution of  
591 metamorphosis in insects. *Annu Rev Entomol* **47**:467–500.  
592 doi:10.1146/annurev.ento.47.091201.145230
- 593 Ureña E, Chafino S, Manjón C, Franch-Marro X, Martín D. 2016. The Occurrence of  
594 the Holometabolous Pupal Stage Requires the Interaction between E93,  
595 Krüppel-Homolog 1 and Broad-Complex. *PLoS Genet* **12**:e1006020-24.  
596 doi:10.1371/journal.pgen.1006020

- 597 Ureña E, Manjón C, Franch-Marro X, Martín D. 2014. Transcription factor E93  
598 specifies adult metamorphosis in hemimetabolous and holometabolous  
599 insects. *Proc Natl Acad Sci U S A* **111**:7024–7029.  
600 doi:10.1073/pnas.1401478111
- 601 Uyehara CM, Nystrom SL, Niederhuber MJ, Leatham-Jensen M, Ma Y, Buttitta LA,  
602 McKay DJ. 2017. Hormone-dependent control of developmental timing  
603 through regulation of chromatin accessibility. *Genes Dev* **31**:862–875.  
604 doi:10.1101/gad.298182.117
- 605 Wang SH, Simcox A, Campbell G. 2000. Dual role for Drosophila epidermal growth  
606 factor receptor signaling in early wing disc development. *Genes Dev* **14**:2271–  
607 2276. doi:10.1101/gad.827000
- 608 Yamanaka N, Rewitz KF, O'Connor MB. 2013. Ecdysone control of developmental  
609 transitions: Lessons from drosophila research. *Annu Rev Entomol* **58**:497–516.  
610 doi:10.1146/annurev-ento-120811-153608
- 611 Zecca M, Struhl G. 2002. Subdivision of the Drosophila wing imaginal disc by EGFR-  
612 mediated signaling. *Development* **129**:1357–1368.  
613 doi:10.1242/dev.129.6.1357
- 614 Zhou X, Riddiford LM. 2002. Broad specifies pupal development and mediates the  
615 “status quo” action of juvenile hormone on the pupal-adult transformation in  
616 Drosophila and Manduca. *Development* **129**:2259–2269.
- 617 Zhu S, Lin S, Kao CF, Awasaki T, Chiang AS, Lee T. 2006. Gradients of the Drosophila  
618 Chinmo BTB-Zinc Finger Protein Govern Neuronal Temporal Identity. *Cell*  
619 **127**:409–422. doi:10.1016/j.cell.2006.08.045
- 620 Zielke N, Edgar BA, DePamphilis ML. 2013. Endoreplication. *Cold Spring Harb*  
621 *Perspect Biol*. doi:10.1101/cshperspect.a012948  
622  
623  
624  
625  
626  
627  
628  
629

630

631

632

633

634

635

636

637 **Figures and Figure Legends**

638

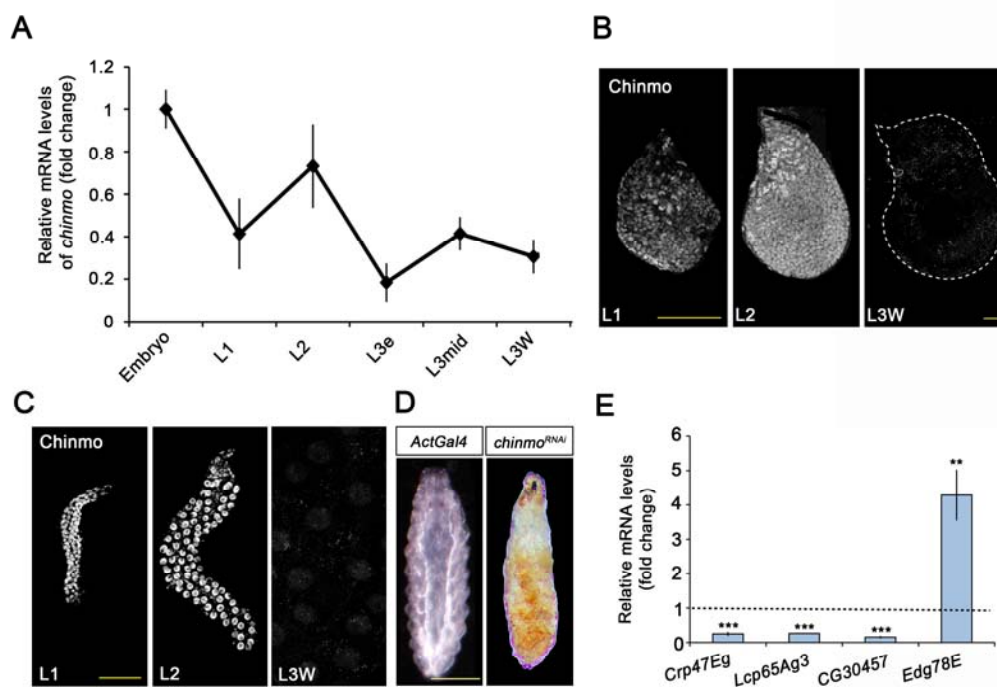

639

640 **Figure 1. Chinmo is expressed during early larval stages and is essential for**

641 **proper larval development.** (A) *chinmo* mRNA levels measured by qRT-PCR from

642 embryo to the wandering stage of L3 (L3W). Transcript abundance values were

643 normalised against the *Rpl32* transcript. Fold changes were relative to the

644 expression of embryo, arbitrarily set to 1. Error bars indicate the SEM (n = 3). (B-C)

645 Chinmo protein levels in the wing disc (B) and SGs (C) of larval L1, L2 and L3W

646 stages. (D) Compared with the control (*ActGal4*), overexpression of *UAS chinmo<sup>RNAi</sup>*

647 in the whole body induced developmental arrest at the L1 stage. Scale bars

648 represent 50 μm (B and C) and 0.5 mm (D). (E) Relative expression of larval-

649 specific (*Crp47Eg*, *Lcp65Ag3* and *CG30457*) and pupal-specific genes (*Edg78E*) in

650 *UASchinmo<sup>RNAi</sup>* L1 larvae measured by qRT-PCR. Transcript abundance values were  
651 normalised against the *Rpl32* transcript. Fold changes were relative to the  
652 expression in control larvae, arbitrarily set to 1 (dashed black line). Error bars  
653 indicate the SEM (n = 3). Statistical significance was calculated using t test ( $***p \leq$   
654  $0.001$ ;  $**p \leq 0.005$ ).

655 **Figure 1—Source Data 1**

656 **Numerical data for Figure 1A and E.**

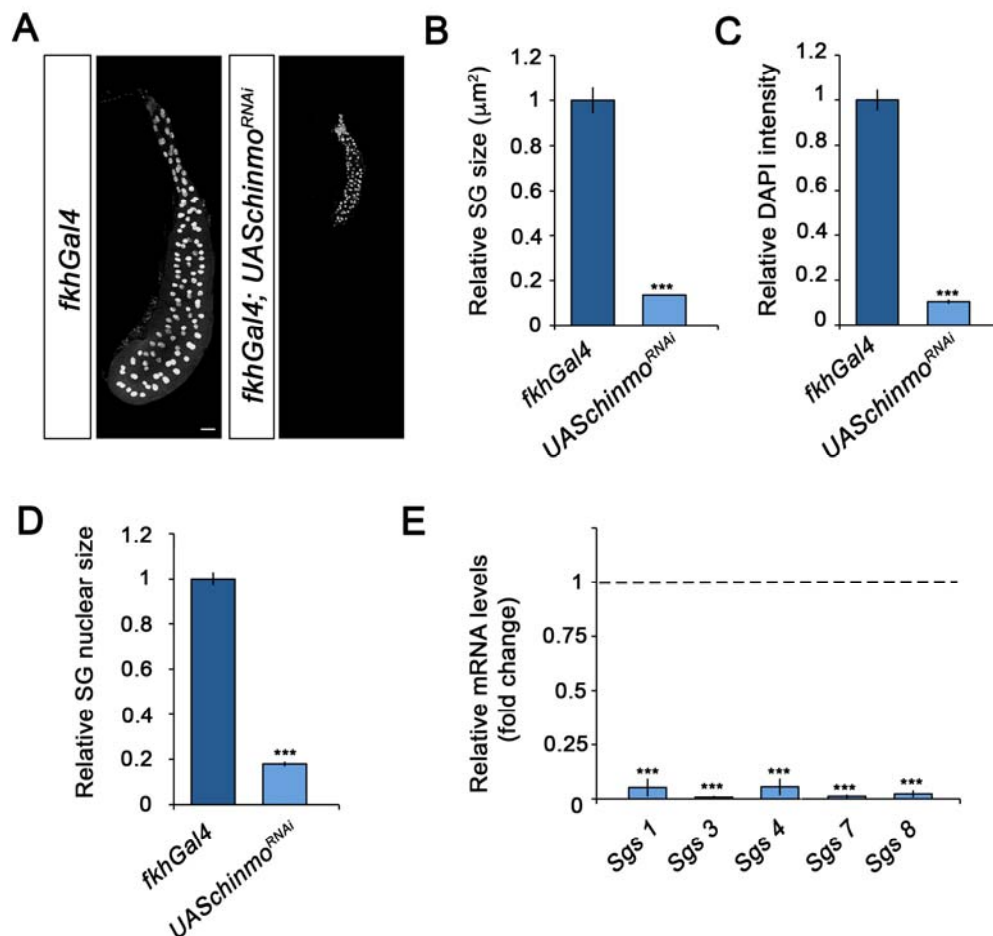

657  
658 **Figure 2. Chinmo is required for proper growth and function of the SG during**  
659 **larval development.** (A) DAPI-staining of SGs from control (*fkhGal4*) and  
660 *UASchinmo<sup>RNAi</sup>* larvae at L3W. Scale bar represents 50  $\mu\text{m}$ . (B-D) Comparison of the  
661 relative size of SGs (n = 10 for each genotype) (B), DAPI intensity (n = 50 for each  
662 genotype) (C), and nucleic size of SGs (n = 50 for each genotype) (D) between  
663 *UASchinmo<sup>RNAi</sup>* and control larvae at L3W. Error bars indicate the SEM (n = 5-8). (E)

664 Relative expression of SG secretion genes in *UASchinmo<sup>RNAi</sup>* animals measured by  
665 qRT-PCR. Transcript abundance values were normalised against the *Rpl32*  
666 transcript. Fold changes were relative to the expression in control larvae,  
667 arbitrarily set to 1 (dashed black line). Error bars indicate the SEM (n = 5-8).  
668 Statistical significance was calculated using t test (\*\* $p \leq 0.001$ ).

669 **Figure 2—Source Data 2**

670 **Numerical data for Figure 2B-E.**

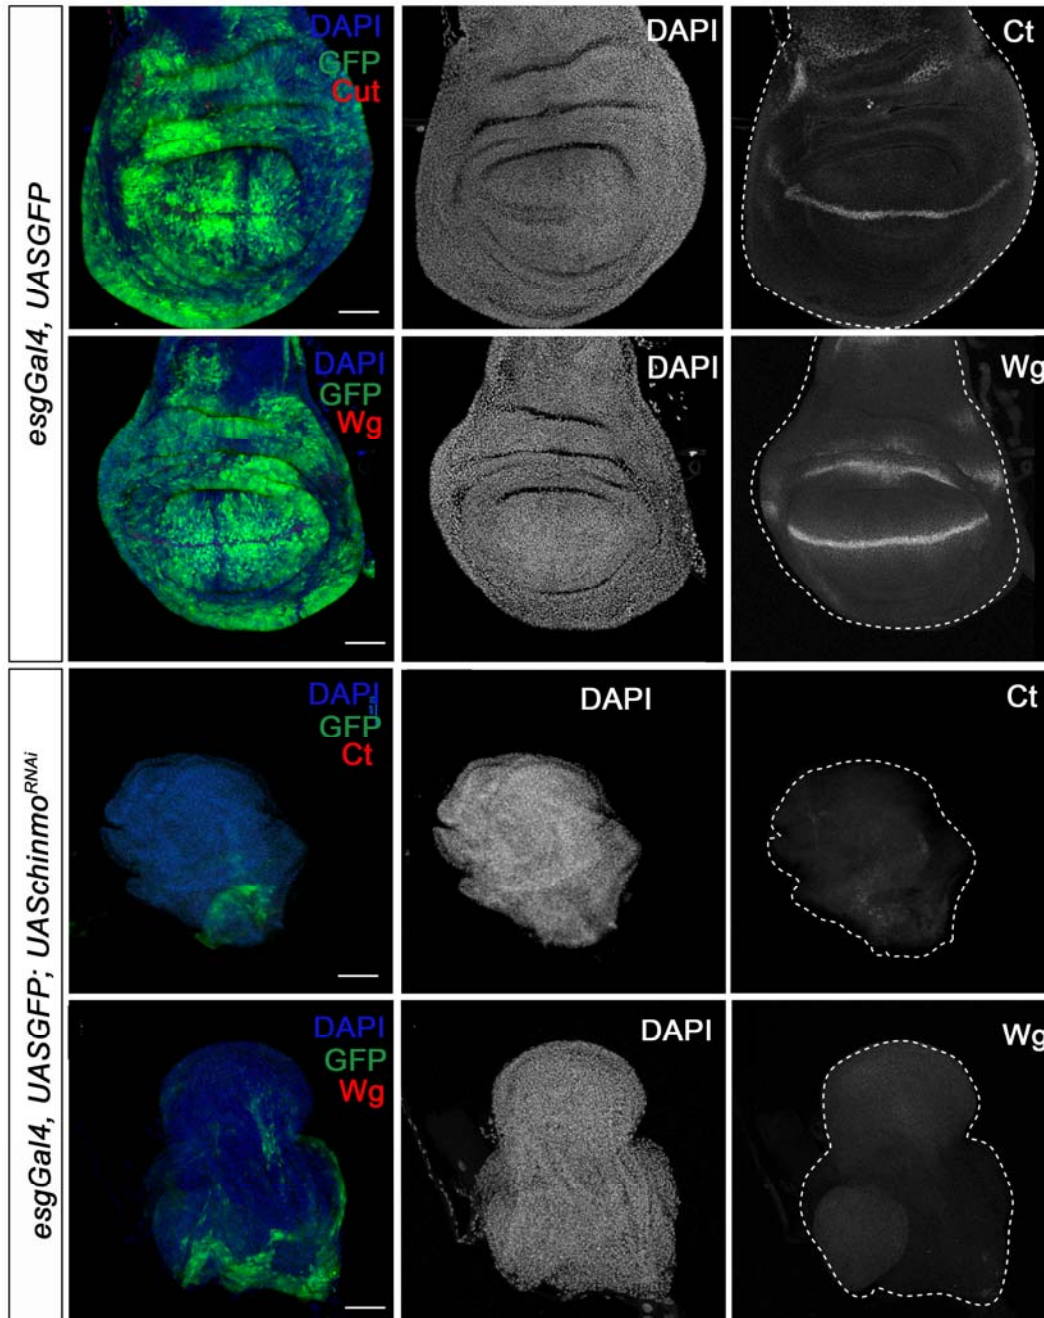

671

672 **Figure 3. Chinmo is necessary for wing development during the larval period.**

673 Expression of Ct and Wg in wing discs of control (*esgGal4*) and *UASchinmo*<sup>RNAi</sup> L3W

674 larvae. Wing discs were labelled to visualise the *esg* domain (GFP in green) and

675 nuclei (DAPI). Ct and Wg were not detected in *UASchinmo*<sup>RNAi</sup>.

676

677

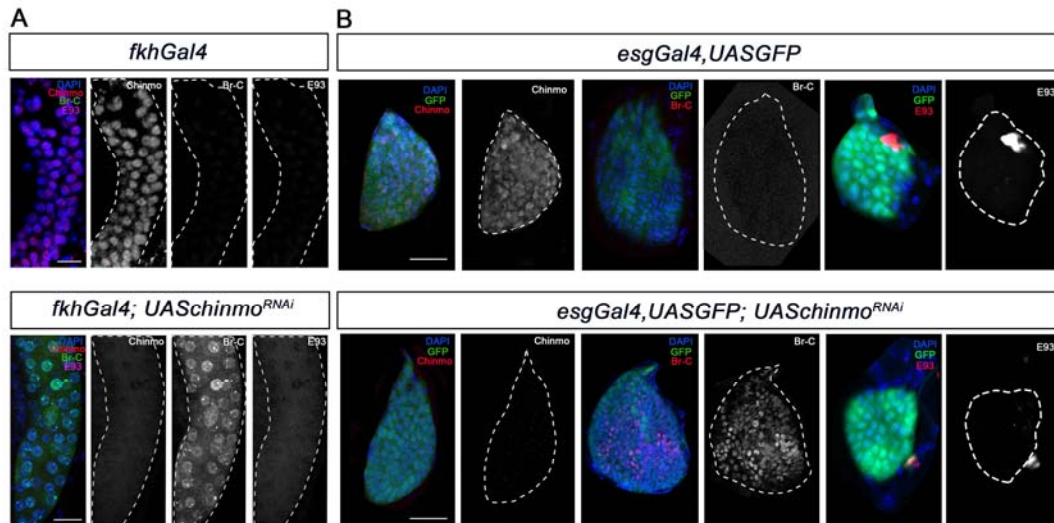

678

679 **Figure 4. Chinmo represses *Br-C* in SGs and wing discs during early larval**

680 **development.** (A) Expression of chinmo, *Br-C* and *E93* in SGs of L1 control

681 (*fkhGal4*) and *UASchinmo*<sup>RNAi</sup>. (B) Expression of Chinmo, *Br-C* and *E93* in wing discs

682 of early L2 control (*esgGal4*) and *UASchinmo*<sup>RNAi</sup>. The *esg* domain is marked with

683 GFP and all cell nucleus with DAPI. In the absence of *chinmo* only *Br-C* shows early

684 up-regulation in both tissues. Scale bars represent 25  $\mu$ m.

685

686



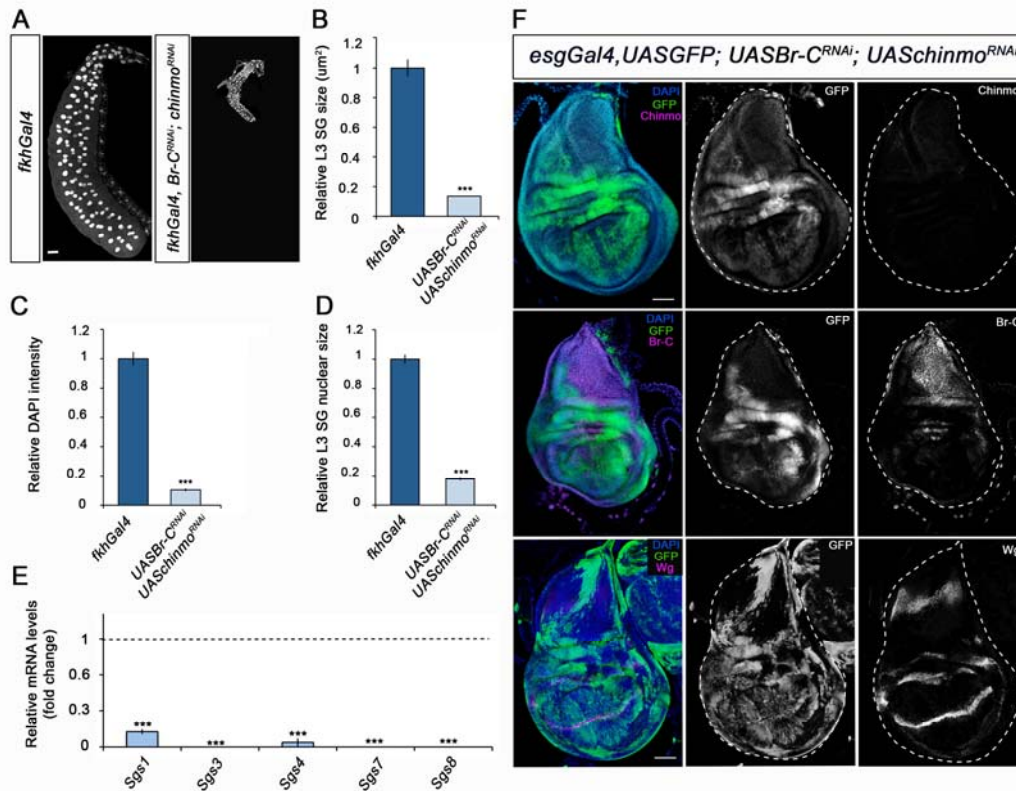

687

688 **Figure 5. Different requirement of chinmo for the larval growth of SGs and**  
 689 **wing discs.** (A) DAPI-stained SGs from control (*fkhGal4*) and *UASBr-C<sup>RNAi</sup>;*  
 690 *UASchinmo<sup>RNAi</sup>* L3W larvae. In the absence of *chinmo* and Br-C, SGs did not grow.  
 691 (B-D) Comparison of the relative size of SGs (n = 10 for each genotype) (B), DAPI  
 692 intensity (n = 50 for each genotype) (C), and nucleic size of SGs (n = 30 for each  
 693 genotype) (D) of control and *UASBr-C<sup>RNAi</sup>; UASchinmo<sup>RNAi</sup>* L3W larvae. (E) Relative  
 694 expression of SG secretion genes in control and *UASBr-C<sup>RNAi</sup>; UASchinmo<sup>RNAi</sup>* L3W  
 695 larvae measured by qRT-PCR. Transcript abundance values were normalised  
 696 against the *Rpl32* transcript. Fold changes were relative to the expression of the  
 697 control, arbitrarily set to 1 (dashed black line). Error bars in B and C indicate the  
 698 SEM (n = 5-8). Asterisks in B-D indicate differences statistically significant at \*\*\**p*  
 699  $\leq 0.001$ . (F) Expression of Chinmo, Br-C and Wg (E) in wing discs of *UASBr-*  
 700 *CRNAi;UASchinmo<sup>RNAi</sup>* L3W larvae. Wing discs labelled to visualise the *esg* domain  
 701 (GFP in green). In the absence of *chinmo* and Br-C, wing discs grow normally and  
 702 express Wg correctly. Scale bars represent 50  $\mu$ m.

703 **Figure 5—Source Data 3**

704 **Numerical data for Figure 5B-E.**

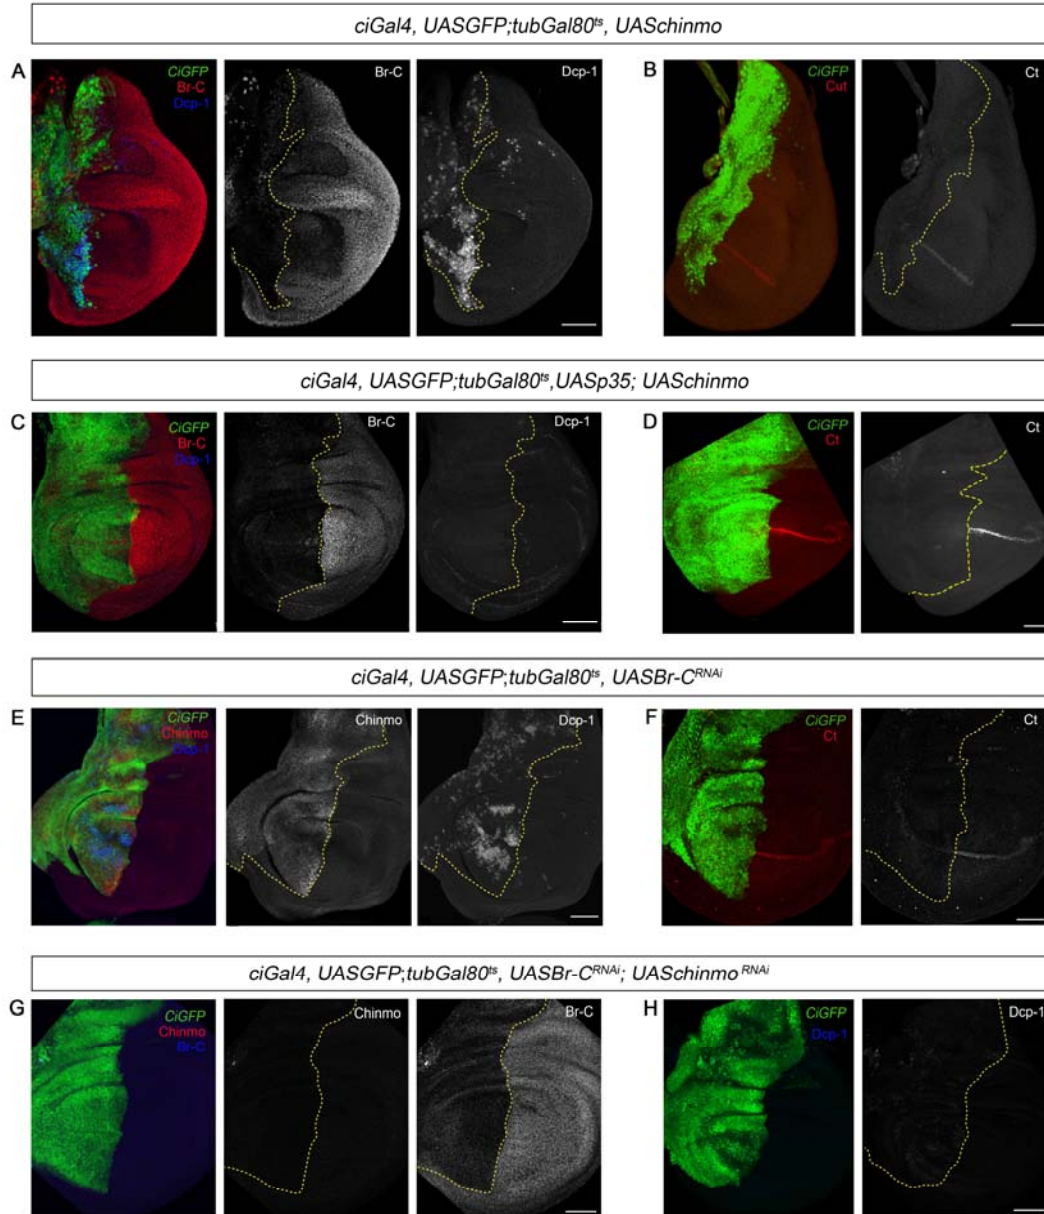

705

706 **Figure 6. Chinmo depletion during late L3 is required for proper larva to**

707 **pupa transition.** (A-H) Images of wing imaginal discs from L3W larvae. The

708 indicated constructs were expressed under the control of the *ciGal4* driver.

709 Overexpression or depletion of the transgenes was activated in early L3 larvae and

710 analyzed at the L3W stage. An UAS-GFP construct was used to mark the anterior

711 region of the disc where the transgenes were induced or repressed (green). (A)

712 Overexpression of *chinmo* repressed Br-C, induced Dcp-1 and (B) depleted Cut. (C)

713 Overexpression of *chinmo* together with *p35* repressed Br-C and blocked Dcp-1,

714 but fails to restore normal expression of Ct (D). (E) Depletion of *Br-C* induced

715 Chinmo and Dcp-1 and (F) repressed Ct. (G) In double depletion of *Br-C* and  
716 *chinmo* (H), Dcp-1 was not detected. Scale bars represent 50  $\mu\text{m}$ .  
717  
718

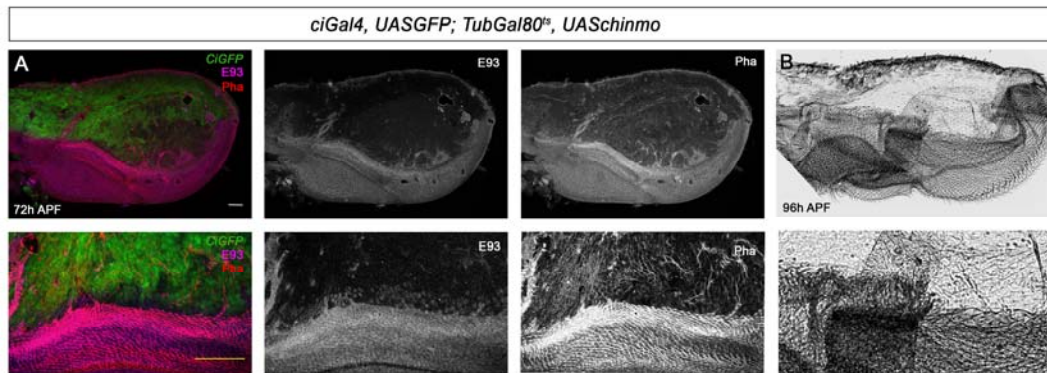

719  
720 **Figure 7. Presence of Chinmo during pupal development blocks adult**  
721 **differentiation.** (A) Overexpression of *chinmo* in the anterior part of the pupal  
722 wing at 72 h after pupa formation (APF) using *ciGal4* driver represses *E93*  
723 expression and produced alterations in Phalloidin (Pha) pattern. (B) Cuticle  
724 preparation of a pupal wing at 96 h APF expressing *chinmo* under the control of  
725 the *CiGal4* driver. Bottom panels are magnifications from upper images. The scale  
726 bars represent 50  $\mu\text{m}$  (top panels) and 100  $\mu\text{m}$  (bottom panels).  
727  
728

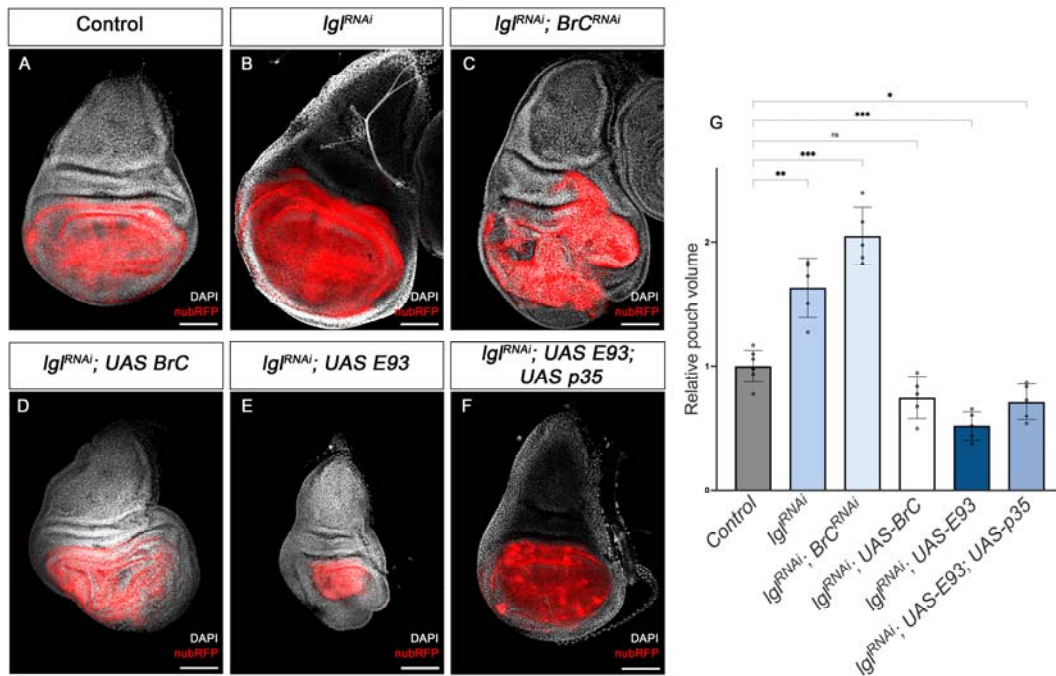

729

730 **Figure 8. Pro-oncogene and tumour suppression action of chinmo and Br-C,**  
 731 **respectively.** (A-F) Confocal images of L3 wing imaginal discs. The indicated  
 732 constructs were expressed under the control of the *nubGal4* driver. A *UASRFP*  
 733 construct was used to mark the pouch region of the disc where the transgenes  
 734 were induced (magenta). Nuclei were labelled with DAPI (grey). Scale bars at 100  
 735  $\mu\text{m}$ . (G) Volumetric quantification of the RFP-positive area of the wing discs for the  
 736 indicated groups. The pouch volumes were normalised to the mean of the control.  
 737 Welch's ANOVA ( $p < 0.0001$ ) followed by Dunnett's T3 post hoc tests (\*  $p < 0.05$ , \*\*  
 738  $p < 0.01$ , \*\*\*  $p < 0.001$ ).

739 **Figure 8—Source Data 4**

740 **Numerical data for Figure 8G.**

741

742

743

744

745

746

747

748

749

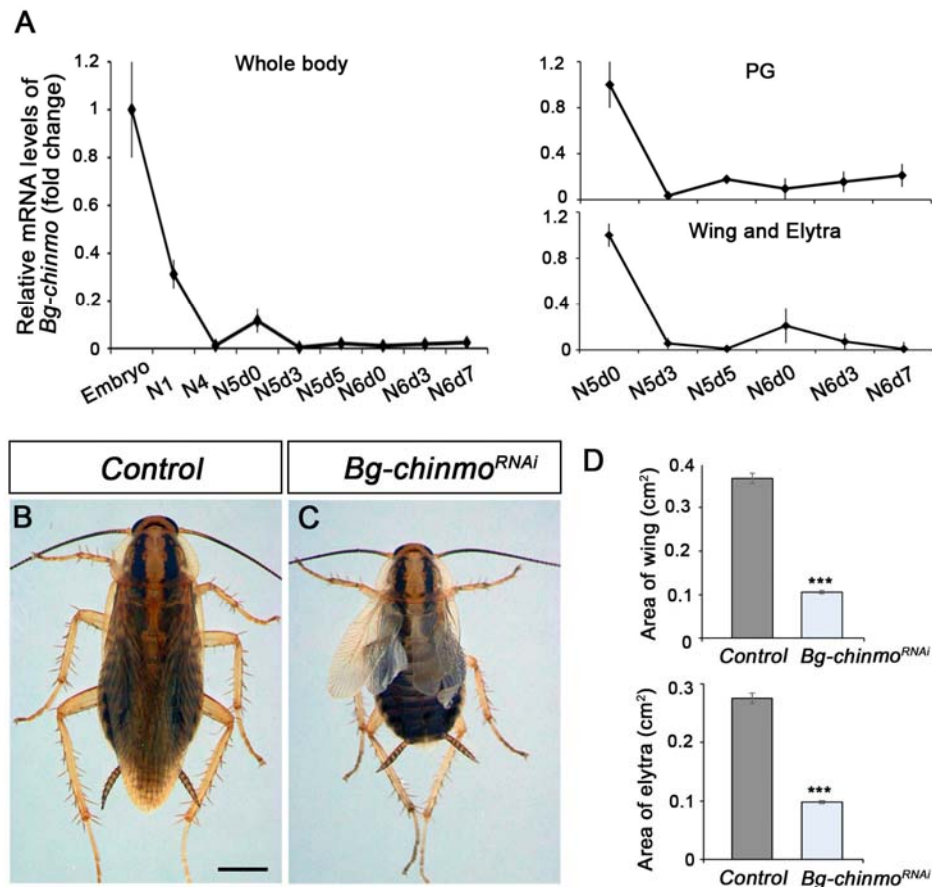

750

751 **Figure 9. Depletion of *chinmo* in *B. germanica* promotes premature**  
 752 **adulthood.** (A) *Bg-chinmo* mRNA levels measured by qRT-PCR from embryo to the  
 753 last nymphal stage (N6) in whole body, prothoracic gland (PG), and wings and  
 754 elytra. Transcript abundance values were normalised against the *Rpl32* transcript.  
 755 Fold changes were relative to the expression of embryo (for whole body) or N5d0  
 756 (for PG and wings and elytra), arbitrarily set to 1. Error bars indicate the SEM  
 757 (n = 3-5). (B-C) Newly moulted N4 nymphs of *B. germanica* were injected with  
 758 *dsMock* (Control) or *dschinmo* (*Bg-chinmo*<sup>RNAi</sup>) and left until adulthood. (B) Dorsal  
 759 view of adult Control, and (C) Premature adult *Bg-chinmo*<sup>RNAi</sup>. (D) Quantification of  
 760 wing and elytra areas (cm<sup>2</sup>) of adult Control and *Bg-chinmo*<sup>RNAi</sup> premature adults.  
 761 Statistical significance was calculated using t-test (\*\*\*)  $p \leq 0.001$ . The scale bar  
 762 represents 2 mm.

763 **Figure 9—Source Data 5**

764 **Numerical data for Figure 9A and D.**

765

766

767

## **Supplementary Information**

### **Antagonistic role of the BTB-zinc finger transcription factors Chinmo and Broad in the juvenile/pupal transition and in growth control**

Sílvia Chafino<sup>1,2</sup>, Panagiotis Giannios<sup>1</sup>, Jordi Casanova<sup>1</sup>, David Martín<sup>2\*</sup> and Xavier Franch-Marro<sup>2\*</sup>

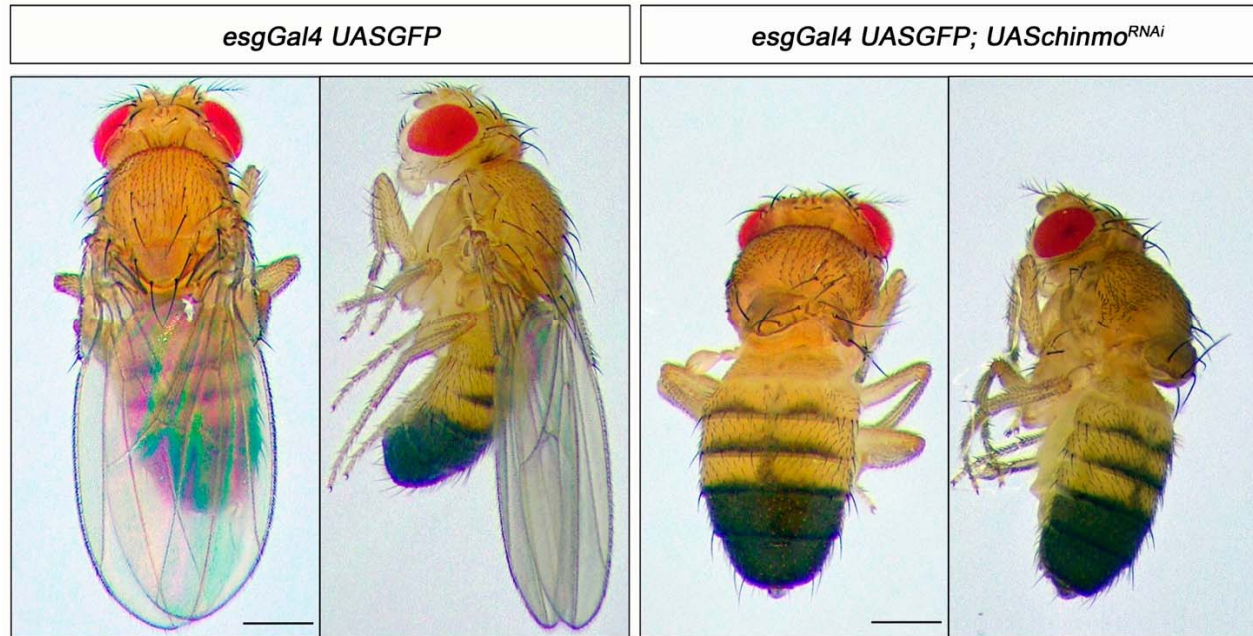

**Supplementary Figure 1. Chinmo is required for wing development during the larval period.** Dorsal and lateral view of control (right panel) and *UASchinmo<sup>RNAi</sup>* (left panel) adult flies. In the absence of Chinmo, flies emerged without wings. Scale bar represents 1 mm.



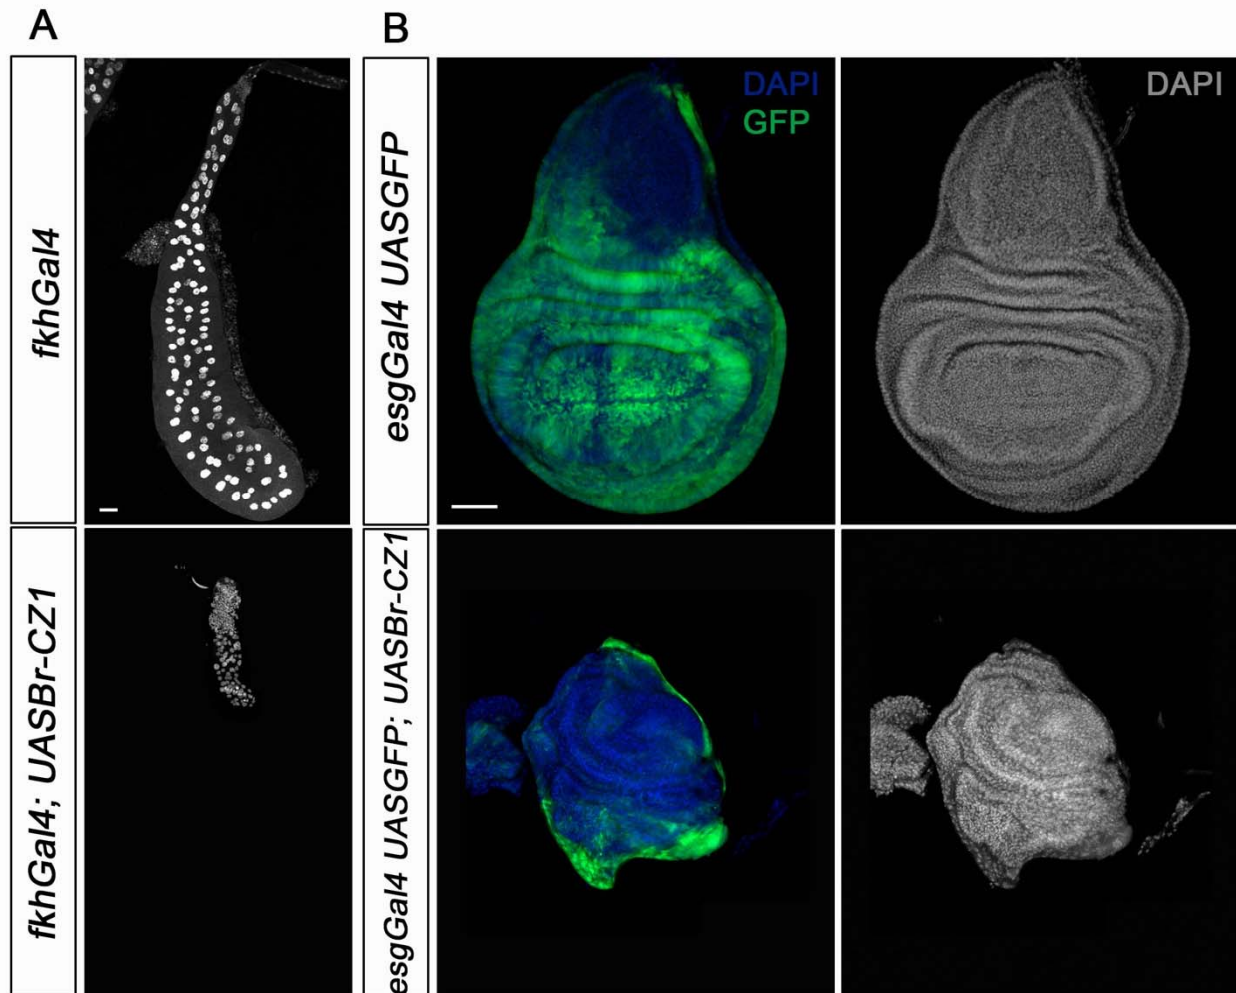

**Supplementary Figure 2. Overexpression of Br-CZ1 phenocopies *chinmo* loss of function in SGs and wing discs.** (A) DAPI-stained SGs from control (*fkhGal4*) and *UASBr-CZ1* in L3W larvae. Overexpression of Br-CZ1 impairs SGs grow. (B) Wing discs of control (*esgGal4*) and *UASBr-CZ1* L3W larvae. Wing discs were labelled to visualize the *esg* domain (GFP in green) and nuclei (DAPI). Overexpression of Br-CZ1 in the *esg* domain abolishes wing development. Scale bar represents 50  $\mu$ m in all panels.
